1           **Polygenic adaptation is not a major driver of disparities in**  
2                           **disease mortality across global populations**

3  
4                                           Ujani Hazra<sup>1</sup> and Joseph Lachance<sup>1\*</sup>

5  
6           <sup>1</sup> School of Biological Sciences, Georgia Institute of Technology, Atlanta Georgia, USA

7           \* Corresponding author:

8  
9           Email addresses of authors:

10          ujani.hazra@gatech.edu

11          joseph.lachance@biology.gatech.edu

12  
13          **Keywords:** evolutionary genetics, health disparities, natural selection, polygenic risk  
14          scores, polygenic adaptation

15  
16          **Running title:** polygenic adaptation and health disparities

17 **Abstract**

18

19 **Background and objectives:** Health disparities are due to a range of socioeconomic  
20 and biological causes, and many common diseases have a genetic basis. Divergent  
21 evolutionary histories cause allele frequencies at disease-associated loci to differ across  
22 global populations. To what extent are differences in disease risks due to natural  
23 selection?

24

25 **Methodology:** Examining a panel of nine global populations, we identified which of the  
26 20 most common causes of death have the largest health disparities. Polygenic risk  
27 scores were computed and compared for 11 common diseases for the same nine  
28 populations. We then used *PolyGraph* to test whether differences in disease risk can be  
29 attributed to polygenic adaptation. Finally, we compared human development index  
30 statistics and polygenic risk scores to mortality rates for each population.

31

32 **Results:** Among common causes of death, HIV/AIDS and tuberculosis exhibited the  
33 greatest disparities in mortality rates. Focusing on common polygenic diseases, we  
34 found that genetic predictions of disease risk varied across global populations (including  
35 elevated risks of lung cancer in Europeans). However, polygenic adaptation tests  
36 largely yielded negative results when applied to common diseases. Our analyses  
37 revealed that natural selection was not a major cause of differences in disease risks  
38 across global populations. We also found that correlations between mortality rates and  
39 human development index statistics were stronger than correlations between mortality  
40 rates and polygenic predictions of disease risks.

41

42 **Conclusions and implications:** Although evolutionary history contributes to  
43 differences in disease risks, health disparities are largely due to socioeconomic and  
44 other environmental factors.

## 45 **Background and Objectives**

46 Epidemiological analyses have reported major disparities in disease prevalence,  
47 incidence, and mortality rates across global populations and ethnic groups (1-3).  
48 Environment and lifestyle changes have been known to drive disease risks across  
49 populations since the Neolithic revolution when societies shifted from foraging to  
50 cultivating food. Increases in population size and changes in eating habits following the  
51 agricultural revolution led to an increase in nutritional and infectious diseases and a  
52 decline in the overall health of populations (4). While mortality rates from infectious  
53 diseases have decreased significantly in the 20th century (5), the “transition to  
54 modernity” (6) now puts the global population at a greater risk of non-communicable  
55 diseases. A recent study of Sub-Saharan African populations has shown that the  
56 leading causes of death have changed between 1990 and 2010 from communicable  
57 diseases in children to non-communicable diseases in adults, with stroke, depression,  
58 diabetes, and ischemic heart disease dominating among upper-middle-income countries  
59 (7). However, the increased prevalence and mortality rates of non-communicable  
60 diseases are not uniform worldwide. Disease burdens of stroke and ischemic heart  
61 disease vary greatly across global populations (8). Other studies have reported that  
62 men of African descent suffer the highest mortality from prostate cancer globally,  
63 indicating geographic and ethnic disparities (9).

64  
65 Disparities in disease prevalence and mortality rates are due to a complex combination  
66 of socioeconomic, demographic, environmental, and genetic causes. Socioeconomic  
67 factors like poverty and lack of access to quality treatment have increased chronic  
68 kidney disease risks, in addition, to an already established racial and ethnic disparities  
69 (10). Similarly, environmental factors like exposure to abandoned uranium mines have  
70 increased risks of hypertension, kidney disease, and cancer in some Native American  
71 populations (11). It should be noted that such disease-causing factors are often  
72 interdependent and act synergistically to influence disease risk. A population’s genetic  
73 makeup can also make them susceptible to certain diseases. For example, people of

74 Ashkenazi descent have a higher frequency of the *BRCA1/2* mutations, subjecting them  
75 to higher risks of breast cancer ([12](#)).

76  
77 Unlike monogenic diseases like sickle cell anemia or cystic fibrosis, most high mortality  
78 non-communicable diseases (e.g., stroke, chronic kidney disease, and diabetes) are  
79 polygenic in nature, i.e., the risks of many complex diseases are due to multiple genetic  
80 variations or single nucleotide polymorphisms (SNPs). Evolutionary history, including  
81 natural selection and founder effects ([13-15](#)), can cause allele frequencies of disease-  
82 associated SNPs to vary among populations. These allele frequency differences can, in  
83 turn, cause hereditary disease risks to vary across the globe. With the advent of  
84 genome-wide association studies (GWAS), large numbers of disease-associated SNPs  
85 are now known ([16](#)), and these SNPs can be used to generate polygenic predictions of  
86 disease risk ([17](#), [18](#)). Importantly, shifts in allele frequencies at trait-associated SNPs  
87 can be used to detect natural selection acting on polygenic diseases ([19](#)).

88  
89 In this paper, we integrate country-level epidemiological data, genetic data from nine  
90 global populations, and GWAS findings to address the following questions: Which  
91 common causes of death exhibit the greatest disparities in mortality rates? To what  
92 extent do polygenic predictions of disease risk vary across global populations? Has  
93 natural selection been a major cause of differences in the risks of common hereditary  
94 diseases? Are disparities in mortality rates better attributed to socioeconomic or genetic  
95 factors?

96  
97

## 98 **Methodology**

### 99 ***Public Health Data: Disparities in Development and Mortality Rate***

100 We collated the top 20 global causes of death (Table 1) and mortality rate data from the  
101 World Health Organization (WHO) report for 2019 ([20](#)), filtering and removing the non-  
102 diseased traits like road injury, falls, and self-harm. Of the 17 disease traits, we  
103 removed neonatal conditions, infectious diseases (diarrhea, tuberculosis, lower  
104 respiratory infection, and HIV/AIDS), cirrhosis of the liver, and stomach cancer due to

105 the lack of large numbers of publicly available GWAS SNPs. This left us with a final list  
106 of 10 diseases out of the 20 most common global causes of death. Diabetes mellitus  
107 was split into type 1 and type 2 diabetes, to accommodate different GWAS for each type  
108 of disease, resulting in a total of 11 diseases analyzed here.

109  
110 Country-specific mortality rates vary for the top 20 causes of death reported by WHO.  
111 To study the disparities in these mortality rates, we focused on nine populations from  
112 the 1000 Genomes Project (1KGP), which have well-defined country-level disease  
113 mortality data and cover each of the major continental super populations. The nine  
114 representative countries and populations in this study are the United Kingdom (GBR),  
115 Spain (IBS), Nigeria (YRI), Sierra Leone (MSL), Bangladesh (BEB), Sri Lanka (STU),  
116 China (CHB), Japan (JPT), and Peru (PEL).

117  
118 To quantify the extent of health disparities, coefficients of variation (CV) of age-  
119 standardized mortality rates were calculated among countries for each of the 20 most  
120 common global causes of death:

$$121 \quad CV = \sigma/\mu$$

122 where  $\sigma$  is the standard deviation and  $\mu$  is the mean of mortality rates in the nine  
123 populations (Table 1). We also obtained 2019 Human Development Index (HDI)  
124 statistics from the *United Nations Development Programme, Human Development*  
125 *Reports* ([21](#)) to study whether a country's socioeconomic and development status play a  
126 role in determining mortality from certain diseases. Linear regression methods were  
127 applied to examine correlations between the HDI and mortality rates for the top 20  
128 causes of death over the nine representative populations.

### 129 **Genetic Data: Population Admixture and Disease Associations**

130  
131 Phase 3 data from the 1KGP was used as a reference for building admixture graphs  
132 and calculating polygenic risk scores. To study polygenic adaptation, publicly available  
133 summary statistics of 11 genome-wide association studies ([22-32](#)) were collated (Table  
134 2), with diabetes mellitus having representative GWAS for type 1 and type 2 diabetes.  
135 We only considered GWAS SNPs with a p-value  $< 5 \times 10^{-8}$  (Table 2). *LiftOver* ([33](#)) was

136 used to convert the coordinates of all GWAS SNPs to the hg19 build for integration with  
137 the Phase 3 data from the 1KGP.

138

### 139 ***Predicting differences in disease risks***

140 Predicted polygenic disease risks were calculated via polygenic risk scores (PRS). Risk  
141 scores were calculated for the 11 GWAS statistics in the nine representative  
142 populations using the Phase 3 data from the 1KGP. As per standard practice (18), PRS  
143 for each individual were calculated as:

$$PRS = \sum_i N_i \beta_i$$

144 where  $N_i$  is an individual's dosage of the effect allele ( $N = 0, 1$  or  $2$ ) of the  $i^{\text{th}}$  SNP and  $\beta_i$   
145 is the effect size of each SNP. PRS was then converted to a standardized normal (i.e.,  
146 z-score) scale, with a global mean of zero and standard deviation of one.

147

148 Differences in predicted polygenic disease risk distribution between European (GBR  
149 and IBS) and non-European (BEB, STU, CHB, JPT, YRI, MSL) populations were  
150 compared using Mann-Whitney U-tests. The Mann-Whitney U-test assumes that the two  
151 groups being compared (European vs. non-European in this case) are independent.  
152 Since PEL is an admixed population, we exclude it from the Mann-Whitney U-Test to  
153 keep the two groups independent. Correlations of mortality rates with predicted  
154 polygenic disease risk scores were studied for the 11 diseases over the nine  
155 representative populations.

156

### 157 ***Examining Polygenic Adaptation***

158 To investigate signals of polygenic adaptation, we used *PolyGraph* (34), A Markov  
159 Chain Monte Carlo (MCMC) algorithm that utilizes admixture graph information to  
160 deduce traces of polygenic adaptation in populations. To detect selection on a trait  
161 *PolyGraph* requires a set of summary statistics from GWAS, neutral control SNPs that  
162 are not associated with the trait, and an admixture graph of the representative  
163 populations. Since *PolyGraph* estimates adaptation based on ancestral and derived  
164 states of SNPs, it is required to have the knowledge of ancestral alleles of all the GWAS

165 hits and polarize the effect sizes of SNPs based on the derived allele. Thus, only GWAS  
166 hits for which ancestral allele information was available from the 1KGP dataset were  
167 used in our study. Odds-ratios (OR) reported by some GWASs were converted to effect  
168 sizes, where  $\beta = \ln(\text{OR})$ .

169  
170 Next, we used *SNPsnap* (35) to obtain frequency-matched neutral SNPs for the GWAS  
171 hits. We frequency matched the GWAS SNPs with European, East Asian, and West  
172 African populations from the 1KGP, and pooled from these three sets to make a  
173 universal set of neutral/control SNPs for each trait. The same set of neutral SNPs was  
174 used to build an admixture graph using *MixMapper* (36). We made scaffold trees with  
175 eight continental populations and putatively added the population from Peru (PEL) as an  
176 admixed population (note that the one branch leading to PEL represents Native  
177 American ancestry). For each disease, *PolyGraph* reports a positive selection  
178 parameter alpha, which is a product of the selection coefficient for the advantageous  
179 allele and the duration of the selective process (34), and a p-value for selection on the  
180 entire admixture graph. To correct for multiple testing, we calculated FDR-adjusted q-  
181 values from the overall p-values of selection from *PolyGraph*.

182  
183

## 184 **Results**

### 185 ***Disparities in Mortality Rates and Development Index***

186 The top 20 causes of death as of 2019 show considerable variation in mortality rates  
187 worldwide (Table 1). The largest disparities were observed for lower respiratory  
188 infections (CV = 1.05), neonatal disease (CV = 1.177), diarrhea (CV = 1.575),  
189 tuberculosis (CV = 1.638), and HIV/AIDS (CV = 1.784), with the African countries  
190 (Nigeria and Sierra Leone) having higher mortality rates than Europe and East Asia.  
191 According to the WHO report for 2019, Japan has a negligible mortality rate for  
192 HIV/AIDS compared to 32.4 deaths per age-standardized 100,000 people in Sierra  
193 Leone. Stroke and ischemic heart disease cause the highest deaths in all the nine  
194 populations, with the United Kingdom and Spain having the lowest mortality rates

195 among the nine countries. Mortality rates from self-harm have the lowest variation  
196 among the nine countries studied here.

197

### 198 ***Differences in Predicted Polygenic Disease Risk***

199 Genetic prediction of disease risk varies across the nine populations (Fig. 1) for all 11  
200 diseases. The predicted polygenic disease risk distributions are standardized, with a  
201 global mean (z-score = 0). Here, positive z-scores indicate predicted polygenic disease  
202 risks higher than the mean global predicted risk, and negative z-scores indicate risks  
203 lower than the mean (Table S1 lists the mean z-score of risk of each of the nine  
204 populations for the 11 diseases). Predicted polygenic disease risks are similar for  
205 populations within the same continent but differ among continental groups. For  
206 example, predicted polygenic risks for chronic kidney diseases vary by continent:  
207 African, East Asian, and American populations have higher predicted risks than South  
208 Asians and Europeans. Polygenic disease risk for lung cancer shows a wide distribution  
209 in European populations, with quite a few individuals with very high predicted risk  
210 scores, along with a high mean predicted risk for GBR and IBS populations. Europeans  
211 exhibit a higher predicted polygenic disease risk for lung cancer on a continental scale  
212 than non-Europeans (p-value =  $3.43 \times 10^{-14}$ , Mann-Whitney U Test). Similarly, ischemic  
213 heart disease, colorectal cancer, and Alzheimer's disease also show higher predicted  
214 polygenic disease risks in Europeans than non-Europeans (p-values for the Mann-  
215 Whitney U Test of each disease are available in Table S2). Chronic obstructive  
216 pulmonary disease narrowly passes the significance threshold to show higher risks in  
217 Europe with a p-value of 0.048 (Mann-Whitney U Test). Breast cancer, stroke, and  
218 chronic kidney disease have similar predicted polygenic risk score distributions in  
219 European, South Asian, and East Asian populations (Table S1). Europeans have lower  
220 predicted polygenic risks for type 1 diabetes (p-value =  $5.3 \times 10^{-3}$ , Mann-Whitney U  
221 Test) and type 2 diabetes (p-value =  $2.74 \times 10^{-9}$ , Mann-Whitney U Test) than all non-  
222 Europeans, combined. Of the diseases studied here, only hypertensive heart disease  
223 does not show significant differences in predicted polygenic disease risks between  
224 Europeans and non-Europeans (p-value = 0.556, Mann-Whitney U Test). Overall, we



225 see considerable variation in genetic predictions of disease risks within individual  
226 populations and among different continental groups.

227

### 228 ***Evidence for Polygenic Adaptation***

229 *MixMapper* was used to generate the admixture graph for the nine populations (Fig. 2).  
230 The graph indicated that the 1KGP population from Peru (PEL) is admixed. The graph  
231 topology showed an early split of African and non-African populations, with the non-  
232 Africans further branching into European and Asian groups. According to the admixture  
233 graph produced by *MixMapper*, the Asian branch further divides into East and South  
234 Asian sub-branches.

235

236 The strength of selection in each branch of the admixture graph was obtained from  
237 *PolyGraph* for all 11 disease traits (Fig. 2). *PolyGraph* detects adaptation of polygenic  
238 traits due to shifts in allele frequency of multiple loci using an admixture graph  
239 framework that considers historical divergence of populations. Although *PolyGraph*  
240 identifies weak signals of polygenic adaptation in all 11 traits, the FDR adjusted q-  
241 values do not pass the threshold of significance (q-value < 0.05) for any of the diseases  
242 studied here. We note that the raw p-value for ischemic heart disease is 0.01 over the  
243 entire admixture graph, but that it does not reach statistical significance once we correct  
244 for multiple testing (FDR-adjusted q-value = 0.11). *Polygraph's* overall p-values and the  
245 FDR adjusted q-values for each disease are listed in Table 2.

246

247 While overall signals of polygenic adaptation are weak, certain branches of the  
248 admixture graph show detectable signals of adaptation for some diseases (branch-  
249 specific statistics from *PolyGraph* for each disease are listed in Table S3). Of the two  
250 major heart diseases we analyzed, both ischemic heart disease and hypertensive heart  
251 disease show a negative signal of adaptation for branches that ultimately lead to PEL.  
252 The branches leading to GBR and IBS for lung cancer show positive selection signals,  
253 consistent with the increased predicted polygenic risk for lung cancer in Europeans.  
254 Adaptation signals for breast cancer are negligible in all the branches of the admixture  
255 graph. Similarly, type 1 diabetes is also found to have evolved neutrally, although

256 predictive risks show Europeans are at a slightly higher risk of getting the disease.  
257 Thus, although *PolyGraph* reports weak branch-specific selection signals for individual  
258 diseases, the overall pattern is that polygenic adaptation is not a driver of disease  
259 disparities among populations.

260

### 261 ***Drivers of Disparity in Mortality Rates***

262 Disparities in disease mortality rates arise from multiple socioeconomic and genetic  
263 factors. To test how socioeconomic status influences mortality rates, correlations of HDI  
264 to mortality rates were calculated. The mortality rates of the top 20 causes of death in  
265 the nine representative populations can mostly be explained by the countries' HDI (Fig.  
266 3A). Mortality rates of colorectal cancer have the highest positive correlation to HDI ( $r =$   
267  $0.74$ ), while mortality rates of road injuries have the highest negative correlation to HDI  
268 ( $r = -0.957$ ). The negative correlation of road injury with HDI should be interpreted with  
269 caution, keeping in mind that mortality rates do not reflect incidence rates.  
270 Underdeveloped countries can have higher mortality rates from road injuries due to the  
271 lack of emergency medical treatment in general, despite having a lower incidence of  
272 road injuries than developed countries. Alzheimer's disease, lung cancer, and stomach  
273 cancer show a positive correlation with HDI, where highly developed countries have  
274 higher mortality rates from these diseases (Table S4). Apart from these four, all other  
275 causes of death show a negative correlation with HDI, indicating countries with lower  
276 development index have higher mortality rates. An interesting observation is that  
277 mortality rates of self-harm are largely independent of HDI. Highly negative correlations  
278 of mortality and HDI for diseases like tuberculosis ( $r = -0.781$ ) and HIV ( $r = -0.842$ ) are  
279 consistent with the knowledge that under-developed and developing countries bear a  
280 higher burden of mortality from infectious diseases. Similarly, neonatal diseases ( $r = -$   
281  $0.935$ ) and diarrhea ( $r = -0.914$ ) are major causes of infant death in under-developed  
282 countries and are consistent with correlations with HDI. Thus, socioeconomic factors  
283 alone play a major role in determining mortality disparities among populations.

284

285 We also examine the correlations of predicted polygenic disease risks and mortality  
286 rates (Fig. 3B). Overall, the magnitudes of these correlations are lower than that of HDI

287 and mortality rates. Eight out of the ten diseases, including COPD, breast cancer,  
288 diabetes, chronic kidney disease, and hypertensive heart disease, show positive  
289 correlations between predicted polygenic disease risks and mortality rates, although  
290 they are not statistically significant. Stroke and ischemic heart disease are interesting  
291 cases with negative correlations of predicted polygenic disease risk and mortality rates.  
292 Thus, although eight diseases show a weak genetic contribution to disparities in  
293 mortality, genetic predictions are inconsistent with epidemiological trends when it comes  
294 to stroke and ischemic heart disease. Overall, our results indicate that both  
295 socioeconomic and genetic factors play a role in determining country-level mortality  
296 rates.

297

298

## 299 **Discussion**

300 Drivers of disparities in disease incidence and mortality rates worldwide are  
301 multifactorial with socioeconomic, demographic, environmental, and genetic aspects  
302 (37). Contributions of genetics to disease disparities are driven by a complex  
303 combination of natural selection, genetic drift, founder effect, and more (38). Here, we  
304 demonstrate the role of polygenic adaptation in shaping disparities in disease mortality  
305 worldwide, and the study has provided four key results. First, in analyzing the top 20  
306 causes of death, mortality rates present considerable differences among countries.  
307 Mortalities from infectious diseases like diarrhea and tuberculosis vary greatly between  
308 continents. On the other hand, self-harm exhibited the lowest variation in mortality rates  
309 worldwide. Second, predicted polygenic risk scores for the 11 common diseases depict  
310 significant differences between European and non-European populations. The  
311 distributions of predicted polygenic risks are consistent within continents but differ  
312 among continental populations. Third, although there exist weak branch-specific  
313 signatures of selection for some diseases, the overall pattern is that polygenic  
314 adaptation is not a major driver of differences in disease risk across populations. And  
315 finally, we show that disparities in mortality rates are highly correlated with a country's  
316 HDI, indicating socioeconomic and environmental factors are strong drivers of  
317 disparities.

318

319

320

321

322

323

324

325

326

327

328

329

330

331

332

333

334

335

336

337

338

339

340

341

342

343

344

345

346

347

348

Predicted polygenic disease risks of complex diseases like diabetes and lung cancer often vary among populations (Fig. 1) (39). This arises from differences in allele frequencies of disease-associated loci in different populations. For example, the C allele (rs7901695) at the *TCF7L2* locus for type 2 diabetes has an almost 40-fold increase in its allele frequency from 0.013 in the Chinese populations (CHB) to 0.488 in the African population (13), which contributes to the general pattern of higher predicted risks of type 2 diabetes in African than in East Asian populations (Fig. 1). Although we focus on differences between populations, considerable variation in predicted polygenic disease risk exists within each population, most notable in the wide distribution of predicted risks for lung cancer in Europeans (GBR and IBS) (Fig. 1). Consequently, while polygenic risk prediction has been shown to identify individuals at high risk of a disease (40), caution should be taken when trying to extend these results to broader populations (this is known as the “Ecological Fallacy” of inferring individual data from an aggregate (41)). Nevertheless, polygenic predictions of disease risks tend to be positively correlated with mortality rates (Fig. 3B).

Differences in polygenic disease risk can be due to multiple evolutionary forces, polygenic adaptation being one of them. While our results suggest weak selection for certain diseases in specific evolutionary branches, the overall lack of statistical significance leads us to rule out polygenic adaptation as a significant evolutionary cause of disease disparities. Selection of polygenic traits is distributed across multiple loci. While some loci have a greater influence on the trait with strong selection acting on them, the total selection of a polygenic trait is often mitigated by the alleles with weaker selection, making it difficult to identify overall signals of selection. This contrasts with some well-known Mendelian diseases like sickle cell anemia, where strong selection on a single locus has increased its prevalence in the African populations due to natural selection on genetic resistance to malaria (42).

Although we obtain compelling results on the drivers of disease disparity, we are aware of certain caveats in our methods. First, we study differences in mortality rates in

349 populations instead of disparities in incidence rates. The reader should be mindful that  
350 while countries have disparities in mortality rates from diseases, there might not be  
351 equivalent disparities in incidence rates. Second, for all the common disease studies,  
352 well-powered GWASs across multiple populations were not available, and thus we  
353 focused on GWASs performed in European populations. Finally, the choice of our nine  
354 representative populations is highly dependent on the availability of genetic data from  
355 these populations. As more GWAS are performed in varied populations worldwide,  
356 future studies will be able to take a more detailed look at polygenic adaptation patterns  
357 and genetic influences of disease disparities.

358

### 359 **Conclusion and Implications:**

360 Disparities in disease mortality rates worldwide arise from multiple factors, and here we  
361 show that natural selection and polygenic adaptation are not primary contributors to  
362 such disparities. We expect to form a more refined idea of how genetics and polygenic  
363 adaptation influence disease disparities as newer data sets become available in the  
364 future. But until then, socioeconomic and developmental factors should be thoroughly  
365 studied to understand the roots of such disparities. To conclude, even though  
366 populations have experienced unique evolutionary histories and many common causes  
367 of diseases are heritable, our results indicate that most health disparities are driven by  
368 factors other than polygenic adaptation.

369

370

### 371 **Funding and Conflict of Interest:**

372 This work was supported by an NIH MIRA grant to Joseph Lachance (R35GM133727).  
373 The funders did not have any role in the design, analysis or writing of this article. We  
374 declare no conflict of interests for both the authors.

375

376

### 377 **Acknowledgments**

378 We thank Aaron Pfennig, Mimi Brown, and Shashwat Nagar for their helpful comments  
379 and suggestions during the writing of this manuscript.

## References

- 380  
381 1. Crimmins E, Kim JK, Vasunilashorn S; Biodemography: new approaches to  
382 understanding trends and differences in population health and mortality.  
383 *Demography* 2010;**47 Suppl**:S41-64. doi: 10.1353/dem.2010.0005.
- 384 2. Mullins CD, Blatt L, Gbarayor CM, et al.; Health disparities: a barrier to high-quality  
385 care. *Am J Health Syst Pharm* 2005;**62**(18):1873-82. doi: 10.2146/ajhp050064.
- 386 3. Phelan JC, Link BG; Controlling disease and creating disparities: a fundamental  
387 cause perspective. *J Gerontol B Psychol Sci Soc Sci* 2005;**60 Spec No 2**:27-33. doi:  
388 10.1093/geronb/60.special\_issue\_2.s27.
- 389 4. Mummert A, Esche E, Robinson J, et al.; Stature and robusticity during the  
390 agricultural transition: evidence from the bioarchaeological record. *Econ Hum Biol*  
391 2011;**9**(3):284-301. doi: 10.1016/j.ehb.2011.03.004.
- 392 5. Armstrong GL, Conn LA, Pinner RW; Trends in infectious disease mortality in the  
393 United States during the 20th century. *JAMA* 1999;**281**(1):61-6. doi:  
394 10.1001/jama.281.1.61.
- 395 6. Corbett S, Courtiol A, Lummaa V, et al.; The transition to modernity and chronic  
396 disease: mismatch and natural selection. *Nat Rev Genet* 2018;**19**(7):419-430. doi:  
397 10.1038/s41576-018-0012-3.
- 398 7. Bigna JJ, Noubiap JJ; The rising burden of non-communicable diseases in sub-  
399 Saharan Africa. *Lancet Glob Health* 2019;**7**(10):e1295-e1296. doi: 10.1016/S2214-  
400 109X(19)30370-5.
- 401 8. Kim AS, Johnston SC; Global variation in the relative burden of stroke and ischemic  
402 heart disease. *Circulation* 2011;**124**(3):314-23. doi:  
403 10.1161/CIRCULATIONAHA.111.018820.
- 404 9. Rebbeck TR; Prostate Cancer Genetics: Variation by Race, Ethnicity, and  
405 Geography. *Semin Radiat Oncol* 2017;**27**(1):3-10. doi:  
406 10.1016/j.semradonc.2016.08.002.
- 407 10. Nicholas SB, Kalantar-Zadeh K, Norris KC; Socioeconomic disparities in chronic  
408 kidney disease. *Adv Chronic Kidney Dis* 2015;**22**(1):6-15. doi:  
409 10.1053/j.ackd.2014.07.002.

- 410 11. Lewis J, Hoover J, MacKenzie D; Mining and Environmental Health Disparities in  
411 Native American Communities. *Curr Environ Health Rep* 2017;**4**(2):130-141. doi:  
412 10.1007/s40572-017-0140-5.
- 413 12. Struewing JP, Hartge P, Wacholder S, et al.; The risk of cancer associated with  
414 specific mutations of BRCA1 and BRCA2 among Ashkenazi Jews. *N Engl J Med*  
415 1997;**336**(20):1401-8. doi: 10.1056/NEJM199705153362001.
- 416 13. Adeyemo A, Rotimi C; Genetic variants associated with complex human diseases  
417 show wide variation across multiple populations. *Public Health Genomics*  
418 2010;**13**(2):72-9. doi: 10.1159/000218711.
- 419 14. Gibson G; Hints of hidden heritability in GWAS. *Nat Genet* 2010;**42**(7):558-60. doi:  
420 10.1038/ng0710-558.
- 421 15. Shifman S, Kuypers J, Kokoris M, et al.; Linkage disequilibrium patterns of the  
422 human genome across populations. *Hum Mol Genet* 2003;**12**(7):771-6. doi:  
423 10.1093/hmg/ddg088.
- 424 16. McCarthy MI, Abecasis GR, Cardon LR, et al.; Genome-wide association studies for  
425 complex traits: consensus, uncertainty and challenges. *Nat Rev Genet*  
426 2008;**9**(5):356-69. doi: 10.1038/nrg2344.
- 427 17. Chande AT, Wang L, Rishishwar L, et al.; GlobAI Distribution of GEnetic Traits  
428 (GADGET) web server: polygenic trait scores worldwide. *Nucleic Acids Res*  
429 2018;**46**(W1):W121-W126. doi: 10.1093/nar/gky415.
- 430 18. Lewis CM, Vassos E; Polygenic risk scores: from research tools to clinical  
431 instruments. *Genome Med* 2020;**12**(1):44. doi: 10.1186/s13073-020-00742-5.
- 432 19. Berg JJ, Coop G; A population genetic signal of polygenic adaptation. *PLoS Genet*  
433 2014;**10**(8):e1004412. doi: 10.1371/journal.pgen.1004412.
- 434 20. World Health Organisation. *Global Health Estimates 2020: Deaths by Cause, Age,*  
435 *Sex, by Country and by Region, 2000-2019.*  
436 [https://www.who.int/data/gho/data/themes/mortality-and-global-health-](https://www.who.int/data/gho/data/themes/mortality-and-global-health-estimates/ghe-leading-causes-of-death)  
437 [estimates/ghe-leading-causes-of-death](https://www.who.int/data/gho/data/themes/mortality-and-global-health-estimates/ghe-leading-causes-of-death) (Date Accessed 2020 Accessed, date last  
438 accessed)
- 439 21. United Nations Development Programme. *Human Development Report 2020. The*  
440 *Next Frontier: Human Development and the Anthropocene.*



- 441 <http://hdr.undp.org/en/content/human-development-report-2020> (Date Accessed  
442 2020 Accessed, date last accessed)
- 443 22. Lambert JC, Ibrahim-Verbaas CA, Harold D, et al.; Meta-analysis of 74,046  
444 individuals identifies 11 new susceptibility loci for Alzheimer's disease. *Nat Genet*  
445 2013;**45**(12):1452-8. doi: 10.1038/ng.2802.
- 446 23. McKay JD, Hung RJ, Han Y, et al.; Large-scale association analysis identifies new  
447 lung cancer susceptibility loci and heterogeneity in genetic susceptibility across  
448 histological subtypes. *Nat Genet* 2017;**49**(7):1126-1132. doi: 10.1038/ng.3892.
- 449 24. Malik R, Chauhan G, Traylor M, et al.; Multiancestry genome-wide association study  
450 of 520,000 subjects identifies 32 loci associated with stroke and stroke subtypes.  
451 *Nat Genet* 2018;**50**(4):524-537. doi: 10.1038/s41588-018-0058-3.
- 452 25. van der Harst P, Verweij N; Identification of 64 Novel Genetic Loci Provides an  
453 Expanded View on the Genetic Architecture of Coronary Artery Disease. *Circ Res*  
454 2018;**122**(3):433-443. doi: 10.1161/CIRCRESAHA.117.312086.
- 455 26. Xue A, Wu Y, Zhu Z, et al.; Genome-wide association analyses identify 143 risk  
456 variants and putative regulatory mechanisms for type 2 diabetes. *Nat Commun*  
457 2018;**9**(1):2941. doi: 10.1038/s41467-018-04951-w.
- 458 27. Giri A, Hellwege JN, Keaton JM, et al.; Trans-ethnic association study of blood  
459 pressure determinants in over 750,000 individuals. *Nat Genet* 2019;**51**(1):51-62. doi:  
460 10.1038/s41588-018-0303-9.
- 461 28. Law PJ, Timofeeva M, Fernandez-Rozadilla C, et al.; Association analyses identify  
462 31 new risk loci for colorectal cancer susceptibility. *Nat Commun* 2019;**10**(1):2154.  
463 doi: 10.1038/s41467-019-09775-w.
- 464 29. Mavaddat N, Michailidou K, Dennis J, et al.; Polygenic Risk Scores for Prediction of  
465 Breast Cancer and Breast Cancer Subtypes. *Am J Hum Genet* 2019;**104**(1):21-34.  
466 doi: 10.1016/j.ajhg.2018.11.002.
- 467 30. Sakornsakolpat P, Prokopenko D, Lamontagne M, et al.; Genetic landscape of  
468 chronic obstructive pulmonary disease identifies heterogeneous cell-type and  
469 phenotype associations. *Nat Genet* 2019;**51**(3):494-505. doi: 10.1038/s41588-018-  
470 0342-2.



- 471 31. Wuttke M, Li Y, Li M, et al.; A catalog of genetic loci associated with kidney function  
472 from analyses of a million individuals. *Nat Genet* 2019;**51**(6):957-972. doi:  
473 10.1038/s41588-019-0407-x.
- 474 32. Chiou J, Geusz RJ, Okino ML, et al.; Interpreting type 1 diabetes risk with genetics  
475 and single-cell epigenomics. *Nature* 2021;**594**(7863):398-402. doi: 10.1038/s41586-  
476 021-03552-w.
- 477 33. Hinrichs AS, Karolchik D, Baertsch R, et al.; The UCSC Genome Browser Database:  
478 update 2006. *Nucleic Acids Res* 2006;**34**(Database issue):D590-8. doi:  
479 10.1093/nar/gkj144.
- 480 34. Racimo F, Berg JJ, Pickrell JK; Detecting Polygenic Adaptation in Admixture  
481 Graphs. *Genetics* 2018;**208**(4):1565-1584. doi: 10.1534/genetics.117.300489.
- 482 35. Pers TH, Timshel P, Hirschhorn JN; SNPsnip: a Web-based tool for identification  
483 and annotation of matched SNPs. *Bioinformatics* 2015;**31**(3):418-20. doi:  
484 10.1093/bioinformatics/btu655.
- 485 36. Lipson M, Loh PR, Levin A, et al.; Efficient moment-based inference of admixture  
486 parameters and sources of gene flow. *Mol Biol Evol* 2013;**30**(8):1788-802. doi:  
487 10.1093/molbev/mst099.
- 488 37. Adler NE, Rehkopf DH; U.S. disparities in health: descriptions, causes, and  
489 mechanisms. *Annu Rev Public Health* 2008;**29**:235-52. doi:  
490 10.1146/annurev.publhealth.29.020907.090852.
- 491 38. Benton ML, Abraham A, LaBella AL, et al.; The influence of evolutionary history on  
492 human health and disease. *Nat Rev Genet* 2021;**22**(5):269-283. doi:  
493 10.1038/s41576-020-00305-9.
- 494 39. Martin AR, Gignoux CR, Walters RK, et al.; Human Demographic History Impacts  
495 Genetic Risk Prediction across Diverse Populations. *Am J Hum Genet*  
496 2020;**107**(4):788-789. doi: 10.1016/j.ajhg.2020.08.020.
- 497 40. Khera AV, Chaffin M, Aragam KG, et al.; Genome-wide polygenic scores for  
498 common diseases identify individuals with risk equivalent to monogenic mutations.  
499 *Nat Genet* 2018;**50**(9):1219-1224. doi: 10.1038/s41588-018-0183-z.
- 500 41. Piantadosi S, Byar DP, Green SB; The ecological fallacy. *Am J Epidemiol*  
501 1988;**127**(5):893-904. doi: 10.1093/oxfordjournals.aje.a114892.

502 42. Allison AC; Protection afforded by sickle-cell trait against subtertian malarial  
503 infection. *Br Med J* 1954;1(4857):290-4. doi: 10.1136/bmj.1.4857.290.

504

505

## Tables

506

**Table 1**

| Causes of death                       | United Kingdom | Spain | Nigeria | Sierra Leone | Bangladesh | Sri Lanka | China | Japan | Peru | CV           |
|---------------------------------------|----------------|-------|---------|--------------|------------|-----------|-------|-------|------|--------------|
| HIV/AIDS                              | 0.2            | 0.8   | 26.8    | 34.2         | 0.4        | 0.2       | 1.6   | 0     | 2.6  | <b>1.784</b> |
| Tuberculosis                          | 0.2            | 0.2   | 99.1    | 43.6         | 25.9       | 3.5       | 1.9   | 0.5   | 7.1  | <b>1.638</b> |
| Diarrheal diseases                    | 0.9            | 0.6   | 79      | 91.1         | 29.6       | 2.5       | 0.7   | 0.5   | 3.3  | <b>1.575</b> |
| Neonatal conditions                   | 3              | 2.2   | 36      | 34.2         | 19         | 4         | 3.8   | 0.7   | 5.2  | <b>1.177</b> |
| Lower respiratory infections          | 20.4           | 8     | 98.1    | 131.4        | 23         | 20.4      | 11.3  | 16.6  | 44.2 | <b>1.05</b>  |
| Cirrhosis of the liver                | 7.9            | 4.8   | 42      | 33.3         | 16.6       | 5         | 7.6   | 4.8   | 19.3 | <b>0.87</b>  |
| Diabetes mellitus                     | 3.6            | 5     | 33.5    | 38           | 25.5       | 47.3      | 8.6   | 1.4   | 13.3 | <b>0.865</b> |
| Road injury                           | 2.8            | 3.1   | 27.3    | 41.6         | 16.7       | 18.1      | 15.1  | 2.2   | 13.4 | <b>0.826</b> |
| Hypertensive heart disease            | 3              | 4.7   | 16.1    | 20.3         | 13.3       | 4.1       | 16.8  | 1.1   | 3.1  | <b>0.802</b> |
| Trachea, bronchus, lung cancers       | 24.7           | 22.8  | 1.4     | 2.4          | 10.2       | 6.6       | 36.6  | 18.1  | 9.5  | <b>0.796</b> |
| Stroke                                | 20.2           | 18.4  | 88.7    | 120.1        | 119.2      | 26.6      | 110.8 | 23.2  | 22.6 | <b>0.77</b>  |
| Stomach cancer                        | 3.3            | 5.2   | 2.5     | 7            | 5.5        | 4.9       | 20.5  | 11.5  | 15.1 | <b>0.723</b> |
| Kidney diseases                       | 2.9            | 5.5   | 23.9    | 30.2         | 9.1        | 26.2      | 10.4  | 7.6   | 21.3 | <b>0.666</b> |
| Chronic obstructive pulmonary disease | 19.8           | 12.3  | 20.8    | 27.4         | 41.7       | 37        | 54.2  | 12.7  | 7.2  | <b>0.603</b> |
| Falls                                 | 4.3            | 2.5   | 8.5     | 9            | 2.6        | 3.9       | 8     | 2     | 3.8  | <b>0.559</b> |
| Colon and rectum cancers              | 12.1           | 14.3  | 4.3     | 5.4          | 3.6        | 3.4       | 13    | 13.6  | 7.9  | <b>0.535</b> |
| Ischemic heart disease                | 43.1           | 34.9  | 100.9   | 139.4        | 94.3       | 101.3     | 97.6  | 30.6  | 40   | <b>0.515</b> |
| Self-harm                             | 6.9            | 5.3   | 6.9     | 11.3         | 3.9        | 12.9      | 6.7   | 12.2  | 2.7  | <b>0.48</b>  |
| Alzheimer disease and other dementias | 42.7           | 21.5  | 19.4    | 19.3         | 13.9       | 27.6      | 17.4  | 7.9   | 16.2 | <b>0.477</b> |
| Breast cancer                         | 9.4            | 6.9   | 10.4    | 14.9         | 5.3        | 5.3       | 4.7   | 5.4   | 6    | <b>0.445</b> |

507

508 **Table 1.** Disparities in mortality rates for the top 20 worldwide causes of death. The top  
509 20 causes of death from the World Health Organization Report of 2019 are reported  
510 here. Population-specific mortality rates for each disease are age-standardized per  
511 100,000 individuals. The 1000 Genomes Project population codes for each country are  
512 United Kingdom (GBR), Spain (IBS), Nigeria (YRI), Sierra Leone (MSL), Bangladesh  
513 (BEB), Sri Lanka (STU), China (CHB), Japan (JPT) and Peru (PEL). CV stands for the  
514 coefficient of variation of mortality rates. Note that mortality for type 1 diabetes and type  
515 2 diabetes are reported jointly as diabetes mellitus.

516

**Table 2**

| Disease                               | GWAS source                                         | # of SNPs | Overall p-value | FDR adjusted q-value |
|---------------------------------------|-----------------------------------------------------|-----------|-----------------|----------------------|
| Ischemic heart disease                | van der Harst et al. (2018) ( <a href="#">25</a> )  | 148       | 0.01            | 0.11                 |
| Stroke                                | Malik et al. (2018) ( <a href="#">24</a> )          | 26        | 0.176           | 0.323                |
| Chronic obstructive pulmonary disease | Sakornsakolpat et al. (2019) ( <a href="#">30</a> ) | 82        | 0.829           | 0.829                |
| Trachea, bronchus, lung cancers       | McKay et al. (2017) ( <a href="#">23</a> )          | 115       | 0.065           | 0.297                |
| Alzheimer disease and other dementias | Lambert et al. (2013) ( <a href="#">22</a> )        | 19        | 0.64            | 0.782                |
| Type 1 Diabetes mellitus              | Chiou et al. (2021) ( <a href="#">32</a> )          | 33        | 0.741           | 0.815                |
| Type 2 Diabetes mellitus              | Xue et al. (2018) ( <a href="#">26</a> )            | 139       | 0.331           | 0.52                 |
| Kidney diseases                       | Wuttke et al. (2019) ( <a href="#">31</a> )         | 308       | 0.152           | 0.323                |
| Hypertensive heart disease            | Giri et al. (2019) ( <a href="#">27</a> )           | 258       | 0.081           | 0.297                |
| Colon and rectum cancers              | Law et al. (2019) ( <a href="#">28</a> )            | 40        | 0.175           | 0.323                |
| Breast cancer                         | Mavaddat et al. (2019) ( <a href="#">29</a> )       | 313       | 0.485           | 0.667                |

517

518

519

520

521

522

**Table 2.** Tests of polygenic adaptation for 11 common diseases. The number of disease-associated loci reported and the reference GWAS are listed for each disease. *Polygraph* reports the overall p-value as a measure of the significance of polygenic adaptation in the entire admixture graph. FDR adjusted q-values correct for multiple testing.

523 **Figures**

524

525 **Figure 1**

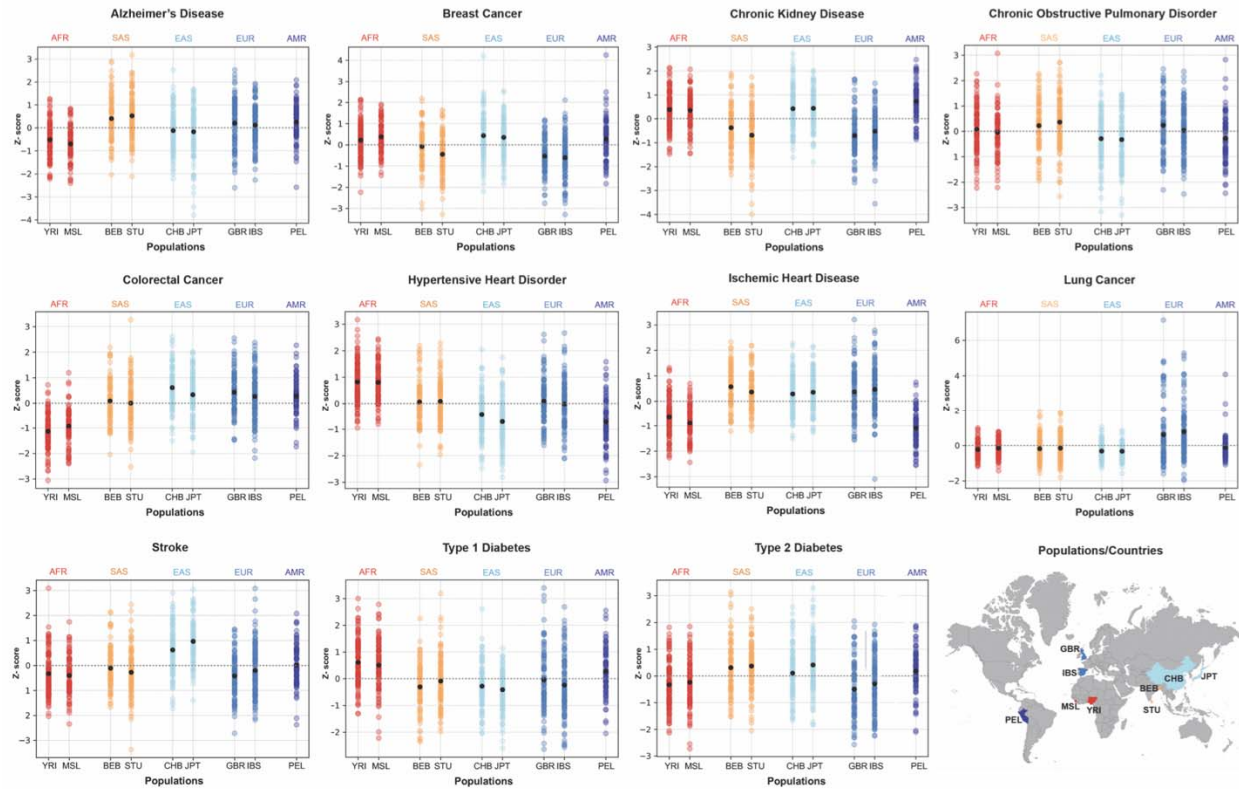

526

527

528 **Figure 1.** Predicted polygenic risks for 11 common diseases over the nine  
529 representative populations. Z-score distributions of predicted polygenic disease risks  
530 are shown here. Each dot in the distribution represents an individual. Distributions  
531 above the global mean (z-score = 0) indicate higher risks, whereas those below zero  
532 indicate lower disease risks. Different colors indicate continental superpopulations.

533

## Figure 2

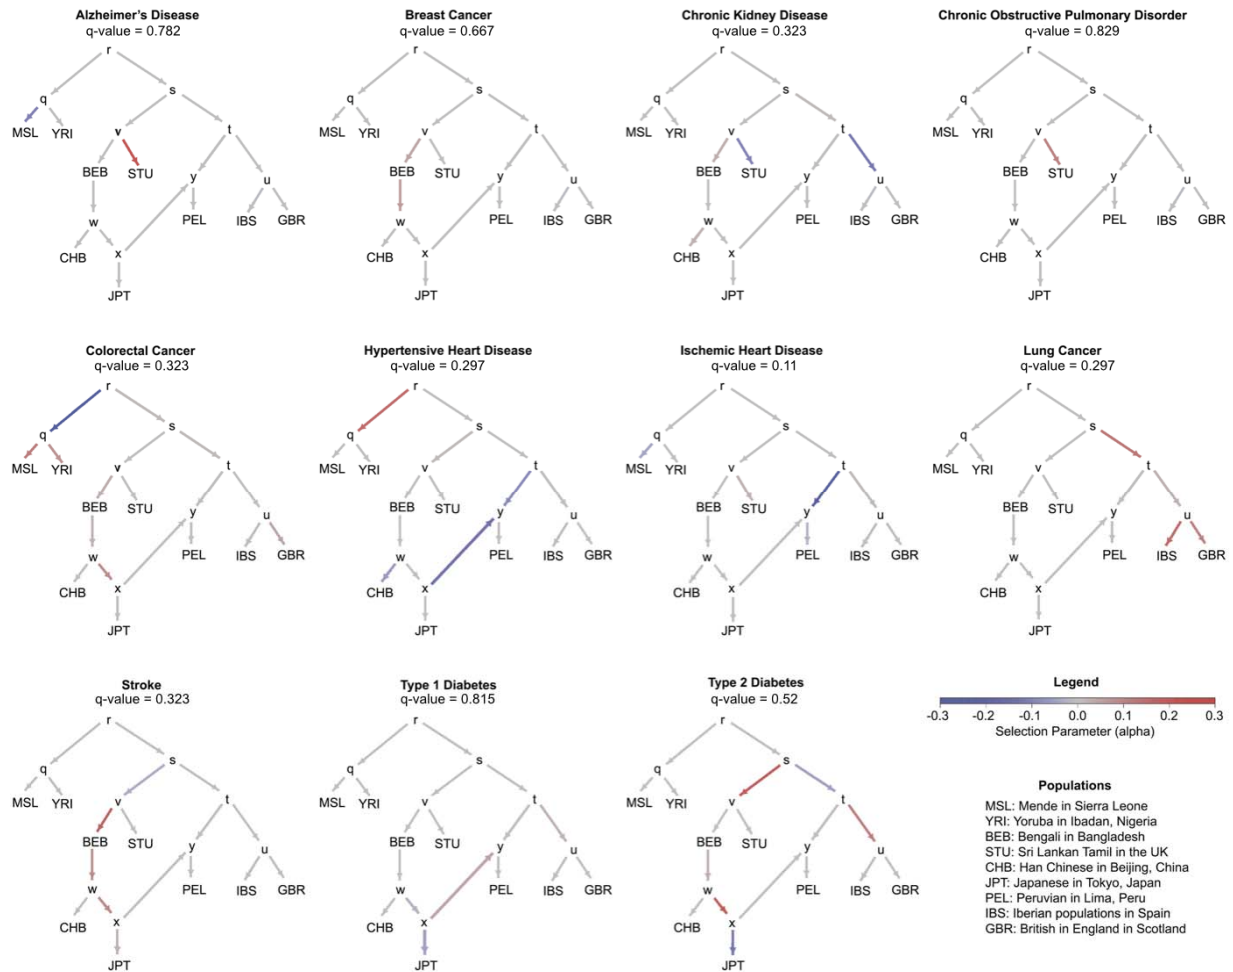

534

535

536

537

538

539

540

541

542

543

**Figure 2.** Minimal evidence of natural selection acting on common polygenic diseases. *MixMapper* was used to generate the admixture graph and *PolyGraph* was used to test for polygenic signatures of adaptation. FDR adjusted q-values are above 0.05 for all nine diseases. The selection parameter alpha reports a product of the selection coefficient for the advantageous allele and the duration of the selective process. Positive values of alpha indicate positive selection in the branch while negative values are indicative of negative selection acting on a trait.

544

**Figure 3**

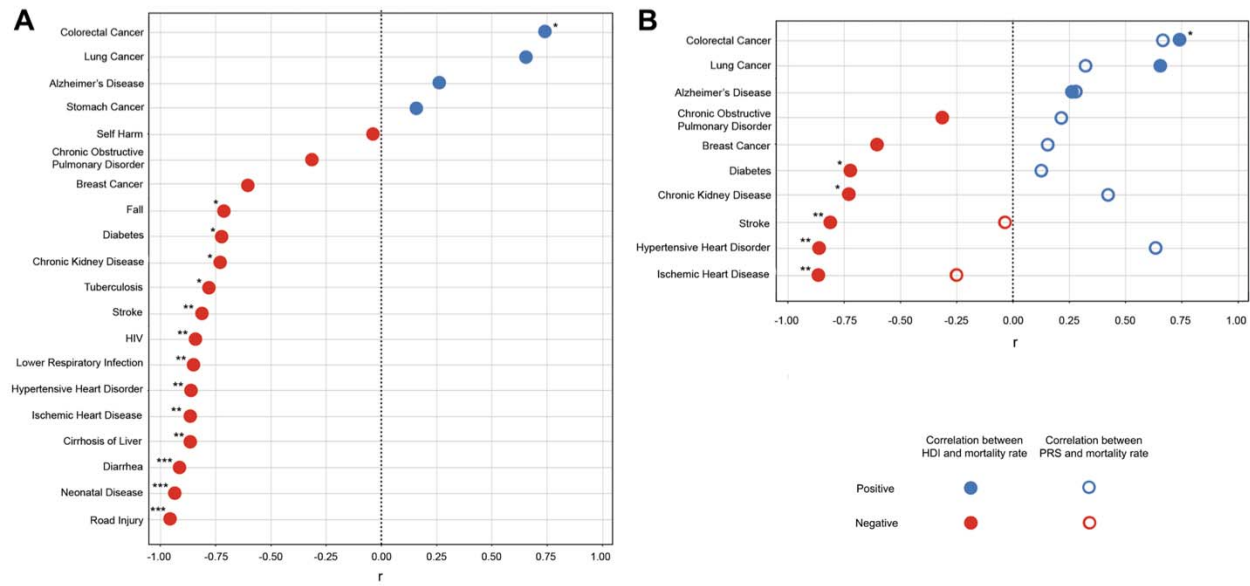

545

546

547

548

549

550

551

552

553

554

**Figure 3.** Correlations of mortality rates with Human Development Index (HDI) statistics and predicted genetic disease risks. **(A)** 14 out of the top 20 causes of death from the 2019 World Health Organization report show a statistically significant correlation between country-specific mortality rates and HDI. **(B)** Correlations of mortality with HDI and polygenic risk scores. Filled circles indicate correlations between mortality rates and HDI, and open circles indicate correlations between mortality rates and PRS (positive correlations in blue, negative correlations in red). \* indicates p-value < 0.05, \*\* indicates p-value < 0.01 and \*\*\* indicates p-value < 0.001.
